# Supplementary material for: Neuroprotective Epigenetic Changes Induced by Maternal Treatment with an Inhibitor of Soluble Epoxide Hydrolase Prevents Early Alzheimer′s Disease Neurodegeneration
Source: MDPI journal article supplement (doi:10.3390/ijms232315151), 2022-12-02
Supplement: s1 [file s1]

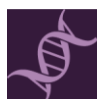

Supplementary Materials

# Neuroprotective epigenetic changes induced by maternal treatment with an inhibitor of soluble epoxide hydrolase prevents early Alzheimer's disease neurodegeneration

Clara Bartra, Alba Irisarri, Ainhoa Villoslada, Rubén Corpas, Samuel Aguirre, Elisa García-Lara, Cristina Suñol, Mercè Pallàs, Christian Grinán-Ferré, Coral Sanfeliu.

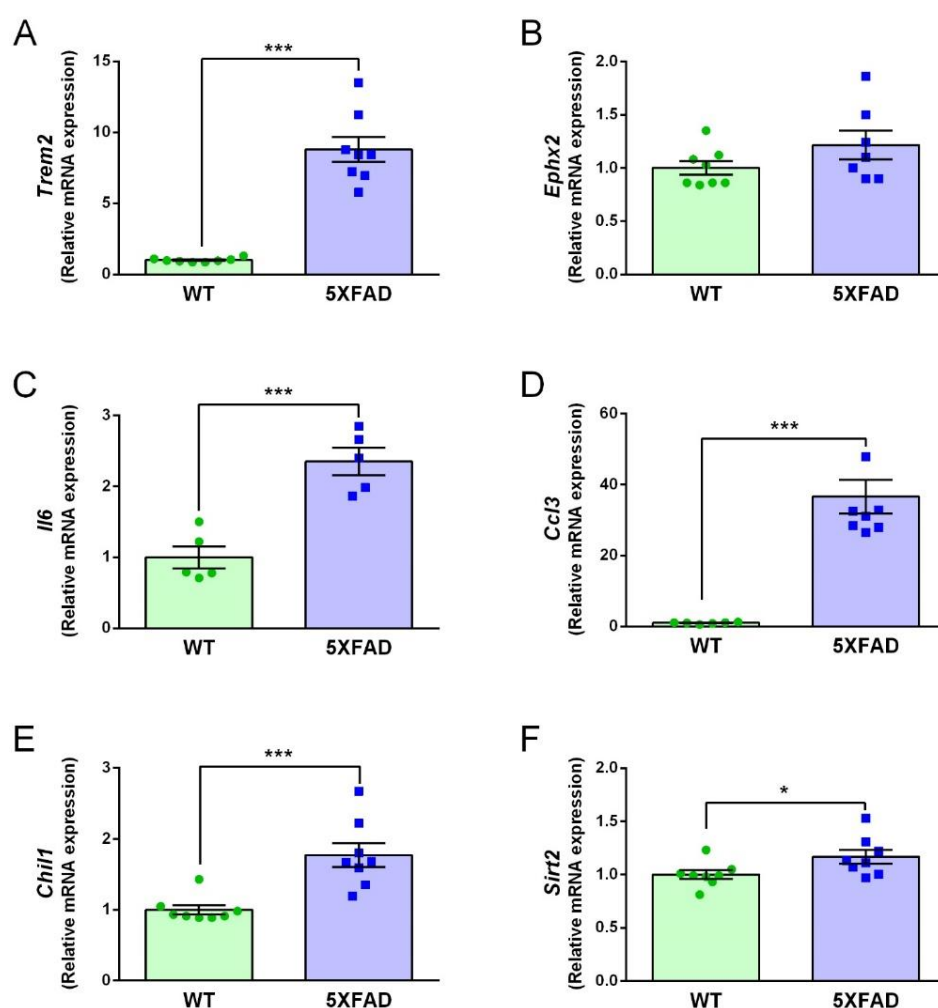

**Figure S1.** Gene expression of inflammatory and neurodegenerative biomarkers in the hippocampus of 7-month-old 5XFAD male mice. Increased relative mRNA values of 5XFAD mice compared to wild-type (WT) littermates of the genes: (A) Triggering receptor expressed on myeloid cells 2, *Trem2*; (B) Epoxide hydrolase 2, *Ephx2*; (C) Chitinase-like 1, *Chl1*; (D) Sirtuin 2, *Sirt2*; (E) Interleukin 6, *Il6*; (F) Chemokine C-C motif ligand 3, *Ccl3*. Values are mean  $\pm$  SEM ( $n = 5 - 8$ ). Statistics: Student's *t* test, \* $p < 0.05$ , \*\*\* $p < 0.001$ .

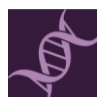

**Table S1.** CRP and TNF $\alpha$  ELISA results from mouse dams plasma samples

|              |                                      | Ct               | TPPU             |
|--------------|--------------------------------------|------------------|------------------|
| CRP          | $\mu\text{g/mL}$<br>(mean $\pm$ SEM) | 10.36 $\pm$ 0.81 | 12.77 $\pm$ 1.36 |
|              | <i>n</i>                             | 6                | 6                |
| TNF $\alpha$ | $\text{pg/mL}$<br>(mean $\pm$ SEM)   | < 2              | < 2              |
|              | <i>n</i>                             | 6                | 5                |

Abbreviations: CRP, C-reactive protein; TNF $\alpha$ , Tumor necrosis factor  $\alpha$ .

**Table S2.** TaqMan Assays used in qPCR analysis

| Gene Name                                        | Gene Symbol  | Assay ID      |
|--------------------------------------------------|--------------|---------------|
| Actin, beta                                      | <i>Actb</i>  | Mm02619580_g1 |
| Brain derived neurotrophic factor                | <i>Bdnf</i>  | Mm04230607_s1 |
| Chemokine C-C motif ligand 3                     | <i>Ccl3</i>  | Mm00441259_g1 |
| Chitinase-like 1                                 | <i>Chil1</i> | Mm00801477_m1 |
| Epoxide hydrolase 2                              | <i>Ephx2</i> | Mm01313813_m1 |
| Histone deacetylase 1                            | <i>Hdac1</i> | Mm02391771_g1 |
| Histone deacetylase 2                            | <i>Hdac2</i> | Mm00515108_m1 |
| Interleukin 6                                    | <i>Il6</i>   | Mm00446191_m1 |
| Sirtuin 2                                        | <i>Sirt2</i> | Mm01149204_m1 |
| Triggering receptor expressed on myeloid cells 2 | <i>Trem2</i> | Mm00451744_m1 |

**Table S3.** Primers used in SYBR Green qPCR analysis

| Gene name                            | Gene symbol   | Forward primer (5'-3') | Reverse primer (5'-3') |
|--------------------------------------|---------------|------------------------|------------------------|
| Actin, beta                          | <i>Actb</i>   | CAACGAGCGGTTCCGAT      | GCCACAGGTTCCATACCCA    |
| DNA methyltransferase (cytosine-5) 1 | <i>Dnmt1</i>  | GGGCTGTGCTTCCTGTCG     | GGTGTCCCCAAGCTTGTCT    |
| DNA methyltransferase 3A             | <i>Dnmt3a</i> | GGGCCACACGGCAGAG       | CACGGTTCTCCTCCTGTTC    |
| DNA methyltransferase 3B             | <i>Dnmt3b</i> | TGCCAGACCTTGAAACCTC    | GCTGGCACCCTCTTCTTCAT   |
| Tet methylcytosine dioxygenase 1     | <i>Tet1</i>   | CCTGCCTCTTCTACGGGAAC   | GATTTGGAAGGCTTTGCGGG   |
| Tet methylcytosine dioxygenase 2     | <i>Tet2</i>   | CCATCATGTTGTGGGACGGA   | ATTCTGAGAACAGCGACGGT   |
| Tet methylcytosine dioxygenase 3     | <i>Tet3</i>   | GGGCAGGCAGCGTAGC       | CAGGATCTGGGGCAAGACAG   |

**Table S4.** Antibodies used for Western blot analysis

| Antibody                                         | Host   | Source (catalog)                   | WB dilution |
|--------------------------------------------------|--------|------------------------------------|-------------|
| Actin                                            | Rabbit | Sigma-Aldrich (#A5060)             | 1:10,000    |
| Early growth response protein 1 (EGR-1)          | Rabbit | Cell Signaling (#4153)             | 1:1000      |
| Glyceraldehyde 3-phosphate dehydrogenase (GAPDH) | Mouse  | Assay designs (#CSA-335)           | 1:5000      |
| Glial fibrillary acidic protein (GFAP)           | Mouse  | Sigma-Aldrich (#G3893)             | 1:500       |
| p-Tau clone AT8                                  | Mouse  | Thermo Fisher Scientific (#MN1020) | 1:1000      |
| $\beta$ -Tubulin                                 | Mouse  | Abcam (#ab21754)                   | 1:10,000    |
| Total tau clone HT7                              | Mouse  | Thermo Fisher Scientific (#MN1000) | 1:1000      |
| Sheep-anti-mouse HRP conjugated                  |        | Amersham (GE) (#NA931)             | 1:2000      |
| Donkey-anti-rabbit HRP conjugated                |        | Amersham (GE) (#NA934)             | 1:2000      |
